# Supplementary material
Source: Springer Nature journal article supplement (https://www.springermedizin.de/resource/supplementary/12879_2013_3586_MOESM1_ESM.pdf/9446204)
Supplement: MOESM1 [file 9446204]

698  
Participants  
Screened

600  
Participants  
Randomized

98 Excluded  
(failed to  
return for  
allocation)

150 Allocated to  
Vitamin D & Gargling  
• 150 Received intervention

130 Completed All Surveys  
13 Completed  $\geq 1 <$  All Surveys  
7 Completed 0 Surveys

19 Lost to follow-up  
No explanation provided  
1 Withdrew from study  
1 was unable to take pills

135 Known Outcomes (included  
in complete case analysis)  
15 Missing outcomes (imputed)

150 Allocated to  
Vitamin D & No Gargling  
• 150 Received intervention

118 Completed All Surveys  
19 Completed  $\geq 1 <$  All Surveys  
13 Completed 0 Surveys

32 Lost to follow-up  
No explanation provided

123 Known Outcomes (included  
in complete case analysis)  
27 Missing outcomes (imputed)

150 Allocated to  
Placebo & Gargling  
• 150 Received intervention

115 Completed All Surveys  
25 Completed  $\geq 1 <$  All Surveys  
10 Completed 0 Surveys

35 Lost to follow-up  
No explanation provided  
3 Withdrew from study  
1 was unable to take pills  
1 found study too intensive  
1 started high dose vitamin  
D supplementation

121 Known Outcomes (included  
in complete case analysis)  
29 Missing outcomes (imputed)

150 Allocated to  
Placebo & No Gargling  
• 150 Received intervention

108 Completed All Surveys  
29 Completed  $\geq 1 <$  All Surveys  
13 Completed 0 Surveys

40 Lost to follow-up  
No explanation provided  
2 Withdrew from study  
1 started contraindicated  
medicine  
1 started high dose vitamin  
D supplementation

113 Known Outcomes (included  
in complete case analysis)  
37 Missing outcomes (imputed)
